# Supplementary material for: Caregivers’ View of Socio-Medical Care in the Terminal Phase of Amyotrophic Lateral Sclerosis—How Can We Improve Holistic Care in ALS?
Source: MDPI journal article supplement (doi:10.3390/jcm11010254), 2022-01-04
Supplement: s1 [file s1]

**Table S1.** Duration and characteristics of specialized palliative care in our sample.

| Number of Patients | Description of SPC                                                             | Details                                                                                          |
|--------------------|--------------------------------------------------------------------------------|--------------------------------------------------------------------------------------------------|
| <i>n</i> = 29      | None                                                                           | -                                                                                                |
| <i>n</i> = 7       | SOPC team, home visits; prescribed at the Motoneuron disease specialist center | prescription: mean 120 (3–420) * days prior death; in contact: mean 30 (3–75) * days prior death |
| <i>n</i> = 7       | SOPC team, home visits; prescribed by other actors                             | in contact: mean 45 (14–240) * days prior death                                                  |
| <i>n</i> = 3       | SOPC team, home visits                                                         | no further details available                                                                     |
| <i>n</i> = 1       | SOPC team, nursing home visits                                                 | first contact 14 months prior death, regularly since 4 months prior death                        |
| <i>n</i> = 1       | Hospice last 6 months                                                          | plus sporadic SOPC contact before                                                                |
| <i>n</i> = 1       | Hospice last 5 days                                                            | -                                                                                                |
| <i>n</i> = 1       | Hospice last 4 days                                                            | plus sporadic SOPC contact during last two years before                                          |

\* Median (range); SOPC; specialized outpatient palliative care.

**Table S2.** Characteristics of disease and wellbeing in different care settings; *n* = 49.

|                                                                   | Family Care ( <i>n</i> = 16) | Family Care and Nursing Service ( <i>n</i> = 20) | Inpatient Care Setting ( <i>n</i> = 13) | <i>p</i>       |
|-------------------------------------------------------------------|------------------------------|--------------------------------------------------|-----------------------------------------|----------------|
| BSFC-S ( <i>n</i> = 46) <sup>a</sup>                              | 9.5 ± 6.6                    | 10.2 ± 6.3                                       | 15.1 ± 7.2                              | 0.069 *        |
| ALSFRS-R prior death <sup>a</sup>                                 | 18.3 ± 6.4                   | 12.0 ± 8.7                                       | 11.3 ± 8.4                              | <b>0.032 *</b> |
| Patients' age (years) <sup>a</sup>                                | 68.6 ± 9.4                   | 70.4 ± 7.9                                       | 74.9 ± 7.5                              | 0.129 ×        |
| Duration MND diagnosis to death (months) <sup>a</sup>             | 26.8 ± 37.6                  | 30.1 ± 28.1                                      | 26.9 ± 29.6                             | 0.936 ×        |
| Gender caregivers m:f <sup>b</sup>                                | 7:9 (44:56)                  | 7:13 (35:65)                                     | 5:8 (38:62)                             | 0.866 °        |
| SPC yes:no <sup>b</sup>                                           | 7:9 (44:56)                  | 11:9 (55:45)                                     | 4:9 (31:69)                             | 0.390 °        |
| Time spent for care (hours per week) <sup>a</sup>                 | 78.1 ± 47.8                  | 50.7 ± 42.7                                      | 0.9 ± 3.0                               | <0.0001 ×      |
| Time spent together, excluding care (hours per week) <sup>a</sup> | 28.6 ± 21.4                  | 25.9 ± 28.0                                      | 8.3 ± 7.0                               | <b>0.012 ×</b> |

<sup>a</sup> Data are presented as mean ± standard deviations; <sup>b</sup> data are presented as n (%); \* ANOVA; × Kruskal–Wallis test; ° chi<sup>2</sup>; ALSFRS-R, Amyotrophic Lateral Sclerosis Functional Rating Scale-Revised; BSFC-s, Burden Scale for Family Caregivers short version; SPC, specialized palliative care; The bold means *p*-values reached significance.
